# Supplementary material for: Dual Strategy Based on Quantum Dot Doping and Phenylethylamine Iodide Surface Modification for High-Performance and Stable Perovskite Solar Cells
Source: MDPI journal article supplement (doi:10.3390/coatings14040409), 2024-03-29
Supplement: s1 [file s1]

# Supplementary Materials: Dual Strategy Based on Quantum Dot Doping and Phenylethylamine Iodide Surface Modification for High-Performance and Stable Perovskite Solar Cells

Shulan Zhang <sup>1</sup>, Renjie Chen <sup>1</sup>, Mujing Qu <sup>1</sup>, Biyu Long <sup>1</sup>, Nannan He <sup>1</sup>, Sumei Huang <sup>1,2</sup>, Xiaohong Chen <sup>1,2,\*</sup>, Huili Li <sup>1,2,3,\*</sup> and Tongtong Xuan <sup>4,\*</sup>

<sup>1</sup> Engineering Research Center for Nanophotonics & Advanced Instrument, Ministry of Education, School of Physics and Electronic Science, East China Normal University, Shanghai 200241, China; shulann@163.com (S.Z.); 52184700021@stu.ecnu.edu.cn (R.C.); mjing2021@163.com (M.Q.); 17742615350@163.com (B.L.); shihhna@163.com (N.H.); smhuang@phy.ecnu.edu.cn (S.H.)

<sup>2</sup> Joint Institute of Advanced Science and Technology, East China Normal University, Shanghai 200241, China

<sup>3</sup> Chongqing Key Laboratory of Precision Optics, Chongqing Institute of East China Normal University, Chongqing 401120, China

<sup>4</sup> Fujian Key Laboratory of Surface and Interface Engineering for High Performance Materials, College of Materials, Xiamen University, Xiamen 361005, China

\* Correspondence: xhchen@phy.ecnu.edu.cn (X.C.); hlli@phy.ecnu.edu.cn (H.L.); ttuan@xmu.edu.cn (T.X.)

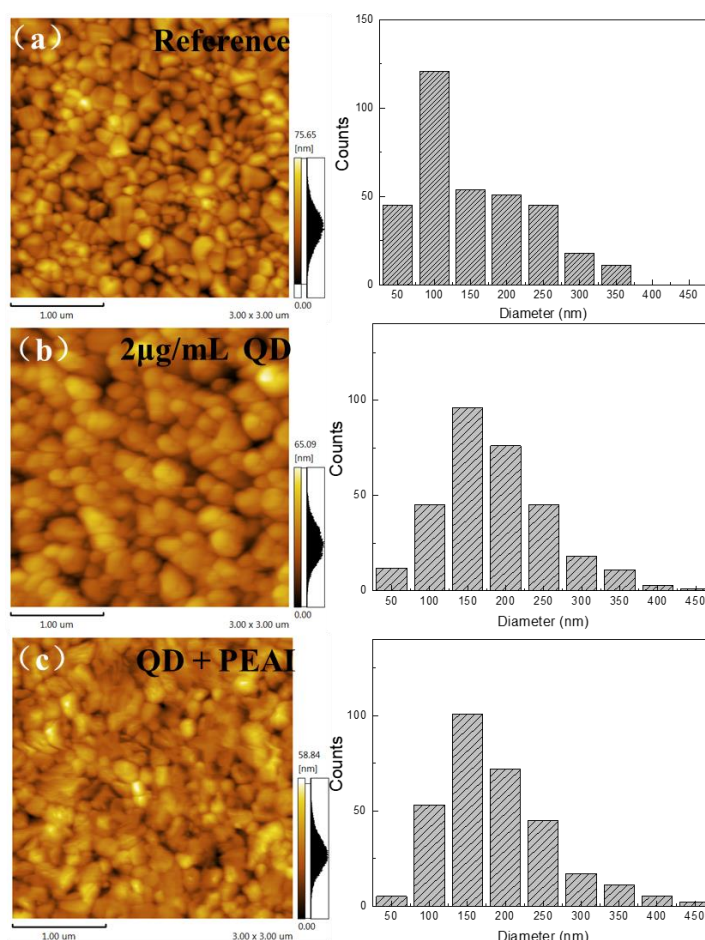

**Figure S1.** AFM images and grain size statistics of perovskite films modified with different conditions: (a) reference, (b) doped with 2 μg/mL CsPbBr<sub>3</sub> QDs, (c) jointly modified with 2 μg/mL CsPbBr<sub>3</sub> QDs and 2 mg/mL PEAI.

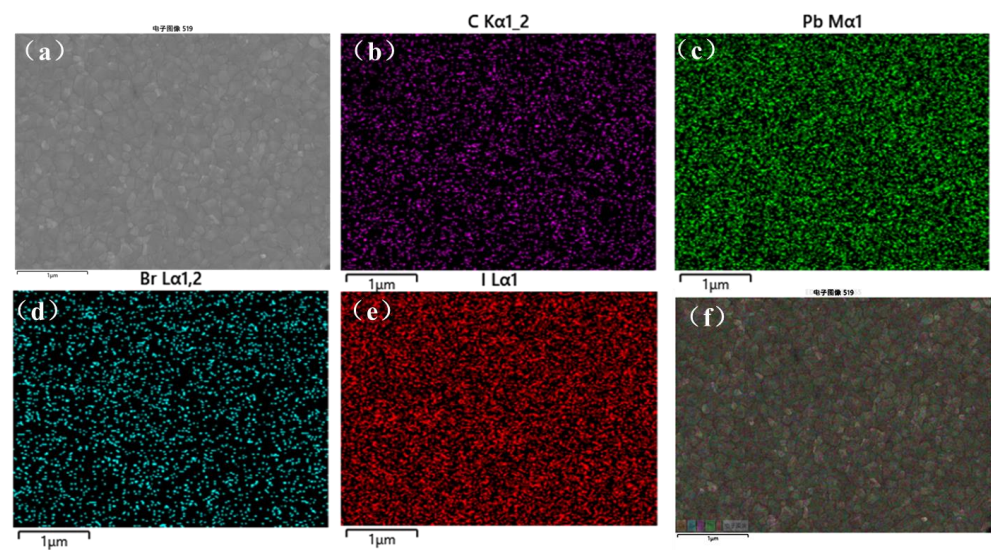

**Figure S2.** EDS mappings of PFs jointly modified with CsPbBr<sub>3</sub> QDs and PEAi: (a) SEM pattern, (b) C element, (c) Pb element, (d) Br element, (e) I element, (f) the combination of SEM and mappings.

**Table S1** The parameters of (110) diffraction peak of PFs modified at different conditions.

| Samples       | Peak location (°) | Intensity (a.u.) | FWHM (°) |
|---------------|-------------------|------------------|----------|
| reference     | 13.97             | 1506             | 0.193    |
| 0.2 μg/mL QDs | 13.99             | 1713             | 0.185    |
| 2 μg/mL QDs   | 14.01             | 2398             | 0.178    |
| 10 μg/mL QDs  | 14.04             | 1968             | 0.183    |
| QDs+PEAi      | 14.01             | 2396             | 0.178    |

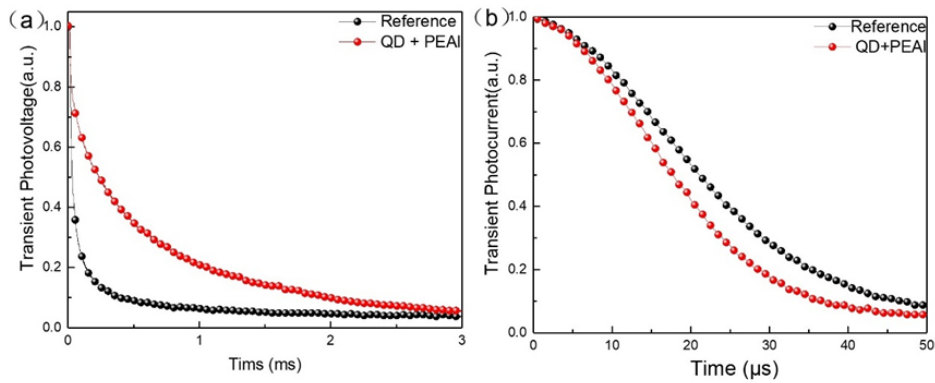

**Figure S3.** TPV (a) and TPC (b) decay curves of original and jointly-modified PSCs.

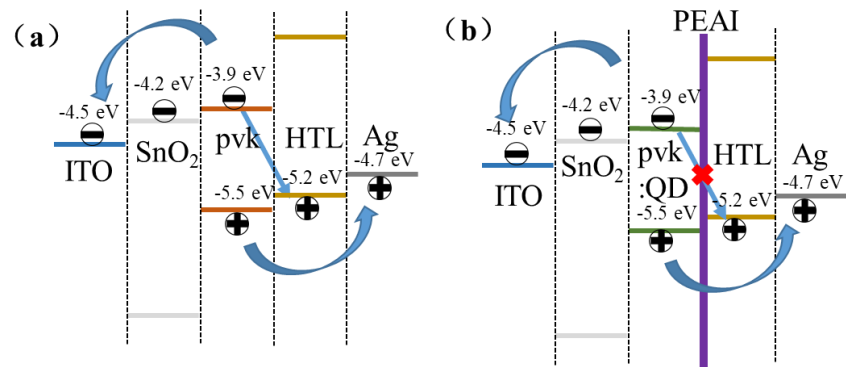

Figure S4. The energy alignment of reference and CsPbBr<sub>3</sub> QDs + PEAI modified PSCs.

The quantum tunneling effect is described as follows:

$$T = (C / A)^2 = \text{Exp} \left[ -2 d \sqrt{\frac{2m_n(qV_0 - E)}{\hbar^2}} \right] \quad (\text{S-1})$$

where T represents the transmission coefficient, C represents the transmission wave function, A represents the incident wave function,  $m_n$  represents the effective mass of the electron,  $\hbar$  represents the reduced Planck constant,  $qV_0$  represents the barrier height, and d represents the thickness of the tunneling layer.

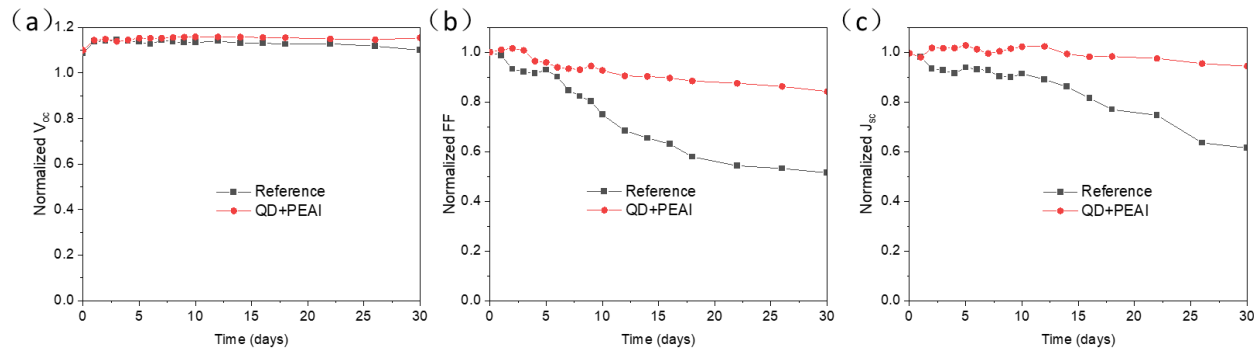

Figure S5. Aging curves of normalized Voc (a), FF(b) and Jsc (c) in air condition with a RH of 40% and RT (unpacked).

Table S2 Simple comparison of PCE MAPbI<sub>3</sub> perovskite solar cells.

| Perovskite         | PCE <sub>max</sub> (%) | Reference |
|--------------------|------------------------|-----------|
| MAPbI <sub>3</sub> | 19.11                  | [1]       |
| MAPbI <sub>3</sub> | 20.06                  | [2]       |
| MAPbI <sub>3</sub> | 20.22                  | [3]       |
| MAPbI <sub>3</sub> | 20.23                  | [4]       |
| MAPbI <sub>3</sub> | 20.46                  | [5]       |
| MAPbI <sub>3</sub> | 20.46                  | [6]       |
| MAPbI <sub>3</sub> | 20.46                  | [7]       |
| MAPbI <sub>3</sub> | 20.93                  | [8]       |
| MAPbI <sub>3</sub> | 21.04                  | This Work |

## References

1. Liu, R.; Wang, J.; Mak, C.H.; Du, M.; Li, F.-F.; Shen, H.-H.; Santoso, S.P.; Yu, E.T.; Yu, X.; Chu, P.K.; et al. Optimizing Black Phosphorus/Halide Perovskite Compositions by Scanning Photoelectrochemical Microscopy. *J. Electrochem. Soc.* **2022**, *169*, 096510, doi:10.1149/1945-7111/ac8d34.
2. Feng, Z.; Weng, C.; Hua, Y.; Chen, X.; Huang, S. Efficient and Stable Perovskite Solar Cells: The Effect of Octadecyl Ammonium Compound Side-Chain. *Chem. Eng. J.* **2023**, *475*, 146498, doi:10.1016/j.cej.2023.146498.
3. Lu, R.; Liu, Y.; Zhang, J.; Zhao, D.; Guo, X.; Li, C. Highly Efficient (200) Oriented MAPbI<sub>3</sub> Perovskite Solar Cells. *Chem. Eng. J.* **2022**, *433*, 133845, doi:10.1016/j.cej.2021.133845.
4. Phase Control of Organometal Halide Perovskites for Development of Highly Efficient Solar Cells | ACS Applied Materials & Interfaces Available online: <https://pubs.acs.org/doi/10.1021/acsami.2c22769> (accessed on 24 March 2024).
5. Yao, Y.; Hang, P.; Wang, P.; Xu, L.; Cui, C.; Xie, J.; Xiao, K.; Li, G.; Lin, P.; Liu, S.; et al. CsPbBr<sub>3</sub> Quantum Dots Assisted Crystallization of Solution-Processed Perovskite Films with Preferential Orientation for High Performance Perovskite Solar Cells. *Nanotechnology* **2020**, *31*, 085401, doi:10.1088/1361-6528/ab55a1.
6. Azadipyrromethene Dye-Assisted Defect Passivation for Efficient and Stable Perovskite Solar Cells | ACS Applied Materials & Interfaces Available online: <https://pubs.acs.org/doi/full/10.1021/acsami.1c20923> (accessed on 24 March 2024).
7. Nguyen, M.H.; Kim, K.-S. Controlling the Grain Formation Process with Oleylamine and 4-Dimethylaminopyridine Additives for Efficient and Stable MAPbI<sub>3</sub> Solar Cells. *Mater. Today Chem.* **2023**, *34*, 101799, doi:10.1016/j.mtchem.2023.101799.
8. Reinforcing the Efficiency and Stability of Perovskite Solar Cells Using a Cesium Sulfate Additive | Journal of Materials Science: Materials in Electronics Available online: <https://link.springer.com/article/10.1007/s10854-023-10008-6> (accessed on 24 March 2024).
